# Supplementary material
Source: PubMed Central journal article supplement (PMC7968776)
Supplement: 14-01060.pdf [file 14-01060.pdf]

**On-line Table: MRI intracranial volumes and measures of cognitive function<sup>a</sup>**

| Measure MRI Volume         | Estimate              | SE                   | P Value Effect Size <sup>b</sup> | Absolute | %     |
|----------------------------|-----------------------|----------------------|----------------------------------|----------|-------|
| <b>3MSE</b>                |                       |                      |                                  |          |       |
| GM, unadjusted             | 6.06                  | 1.26                 | $1.5 \times 10^{-6}$             | -13.06   | -15.4 |
| GM, adjusted               | 4.87                  | 1.60                 | $2.3 \times 10^{-3}$             | -10.66   | -12.6 |
| WM, unadjusted             | 0.08                  | 1.58                 | .96                              | -0.16    | -0.2  |
| WM, adjusted               | -2.19                 | 1.64                 | .18                              | 4.47     | 5.3   |
| WM lesion, unadjusted      | $-7.9 \times 10^{-3}$ | $2.5 \times 10^{-3}$ | $2.0 \times 10^{-3}$             | -8.87    | -10.5 |
| WM lesion, adjusted        | $-4.3 \times 10^{-3}$ | $3.0 \times 10^{-3}$ | .15                              | -5.01    | -5.9  |
| <b>MoCA</b>                |                       |                      |                                  |          |       |
| GM, unadjusted             | 3.45                  | 0.78                 | $9.6 \times 10^{-6}$             | -1.80    | -9.1  |
| GM, adjusted               | 2.30                  | 1.01                 | $2.2 \times 10^{-2}$             | -1.22    | -6.2  |
| WM, unadjusted             | -0.05                 | 0.97                 | .96                              | 0.02     | 0.1   |
| WM, adjusted               | -0.81                 | 1.01                 | .43                              | 0.38     | 1.9   |
| WM lesion, unadjusted      | $-2.7 \times 10^{-3}$ | $1.5 \times 10^{-3}$ | .06                              | -0.74    | -3.8  |
| WM lesion, adjusted        | $-4.2 \times 10^{-4}$ | $1.8 \times 10^{-3}$ | .82                              | -0.12    | -0.6  |
| <b>RAVLT</b>               |                       |                      |                                  |          |       |
| GM, unadjusted             | 2.79                  | 0.49                 | $1.3 \times 10^{-8}$             | -2.83    | -7.4  |
| GM, adjusted               | 0.98                  | 0.59                 | .10                              | -1.02    | -2.7  |
| WM, unadjusted             | -0.33                 | 0.60                 | .58                              | 0.30     | 0.8   |
| WM, adjusted               | -0.57                 | 0.57                 | .32                              | 0.52     | 1.4   |
| WM lesion, unadjusted      | $-2.1 \times 10^{-3}$ | $9.0 \times 10^{-4}$ | $2.9 \times 10^{-2}$             | -1.08    | -2.9  |
| WM lesion, adjusted        | $5.3 \times 10^{-4}$  | $1.0 \times 10^{-3}$ | .61                              | 0.28     | 0.8   |
| <b>DSC</b>                 |                       |                      |                                  |          |       |
| GM, unadjusted             | 4.93                  | 0.73                 | $1.4 \times 10^{-11}$            | -6.16    | -12.8 |
| GM, adjusted               | 2.05                  | 0.84                 | $1.5 \times 10^{-2}$             | -2.66    | -5.5  |
| WM, unadjusted             | 2.58                  | 0.88                 | $3.5 \times 10^{-3}$             | -2.85    | -5.9  |
| WM, adjusted               | 1.27                  | 0.82                 | .012                             | -1.42    | -3.0  |
| WM lesion, unadjusted      | $-8.8 \times 10^{-3}$ | $1.3 \times 10^{-3}$ | $6.7 \times 10^{-12}$            | -5.64    | -11.7 |
| WM lesion, adjusted        | $-5.0 \times 10^{-3}$ | $1.5 \times 10^{-3}$ | $6.7 \times 10^{-4}$             | -3.31    | -6.9  |
| <b>VFA</b>                 |                       |                      |                                  |          |       |
| GM, unadjusted             | 1.87                  | 0.63                 | $3.0 \times 10^{-3}$             | -0.79    | -5.1  |
| GM, adjusted               | 0.69                  | 0.90                 | .44                              | -0.30    | -1.9  |
| WM, unadjusted             | 0.69                  | 0.75                 | .36                              | -0.25    | -1.6  |
| WM, adjusted               | -0.18                 | 0.88                 | .84                              | 0.07     | 0.4   |
| WM lesion, unadjusted      | $-3.0 \times 10^{-3}$ | $1.2 \times 10^{-3}$ | $1.5 \times 10^{-2}$             | -0.66    | -4.2  |
| WM lesion, adjusted        | $-1.8 \times 10^{-3}$ | $1.7 \times 10^{-3}$ | .29                              | -0.39    | -2.5  |
| <b>Stroop errors</b>       |                       |                      |                                  |          |       |
| GM, unadjusted             | -10.62                | 2.98                 | $3.7 \times 10^{-4}$             | 1.16     | 34.2  |
| GM, adjusted               | -4.09                 | 4.32                 | .34                              | 0.41     | 12.0  |
| WM, unadjusted             | 2.53                  | 3.96                 | .52                              | -0.20    | -5.8  |
| WM, adjusted               | -0.54                 | 4.23                 | .90                              | 0.04     | 1.3   |
| WM lesion, unadjusted      | $1.1 \times 10^{-2}$  | $8.2 \times 10^{-3}$ | .17                              | 0.58     | 17.1  |
| WM lesion, adjusted        | $1.4 \times 10^{-3}$  | $9.4 \times 10^{-3}$ | .88                              | 0.07     | 2.1   |
| <b>Stroop interference</b> |                       |                      |                                  |          |       |
| GM, unadjusted             | -4.45                 | 0.83                 | $6.9 \times 10^{-8}$             | 4.15     | 13.1  |
| GM, adjusted               | -2.36                 | 1.12                 | $3.5 \times 10^{-2}$             | 2.14     | 6.8   |
| WM, unadjusted             | -2.28                 | 1.07                 | $3.3 \times 10^{-2}$             | 1.75     | 5.5   |
| WM, adjusted               | -1.28                 | 1.13                 | .26                              | 0.97     | 3.1   |
| WM lesion, unadjusted      | $8.1 \times 10^{-3}$  | $1.6 \times 10^{-3}$ | $5.5 \times 10^{-7}$             | 3.85     | 12.2  |
| WM lesion, adjusted        | $6.1 \times 10^{-3}$  | $2.2 \times 10^{-3}$ | $4.6 \times 10^{-3}$             | 2.85     | 9.0   |

**Note:**—SE indicates standard error; 3MSE, modified MMSE; RAVLT, Rey Auditory Verbal Learning Test.

<sup>a</sup> Adjustment reflects age, sex, body mass index, HbA1c, and level of education.

<sup>b</sup> "Effect Size" is the absolute and percentage difference from the mean cognitive score reported in Table 3 computed for each 1 SD change in the MRI measure.
